# Supplementary material for: Acinetobacter baumannii LOS Regulate the Expression of Inflammatory Cytokine Genes and Proteins in Human Mast Cells
Source: Pathogens. 2021 Mar 3;10(3):290. doi: 10.3390/pathogens10030290 (PMC7998227; doi:10.3390/pathogens10030290)
Supplement: Supplementary file 1 [file pathogens-10-00290-s001.pdf]

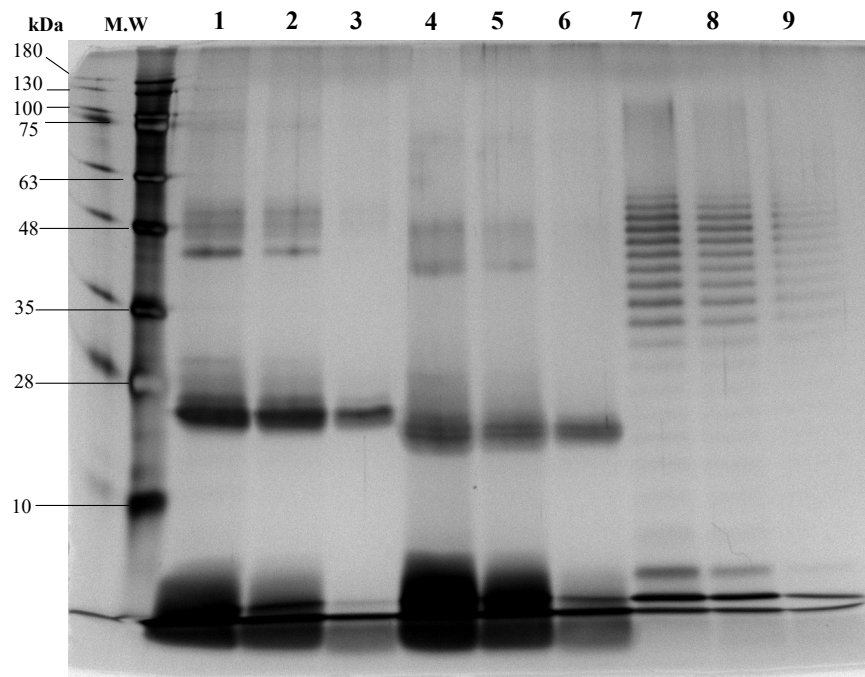

**Figure S1.** SDS-PAGE and silver staining analysis of *A. baumannii* lipooligosaccharides. Lane 1, ATCC 19606, 10 µg; lane 2, 5 µg; lane 3, 1 µg, lane 4, MDRA T14, 10 µg; lane 5, 5 µg; lane 6, 1 µg, lane 7, *E. coli* O111: B4 (LPS), 10 µg; lane 8, 5 µg; lane 9, 1 µg. Each LOS sample was treated for 5 min at 100 °C in 0.05 M Tris hydrochloride buffer (pH 6.8), 2 % SDS and 0.01 % bromophenol blue, and fractionated on an SDS-polyacrylamide gel containing 4 % and 14 % acrylamide with 4M urea in the stacking and separating gels, respectively. LOS preparations were stained by the conventional silver staining method according to manufacturer's instructions (Cosmo Bio, Tokyo, Japan).

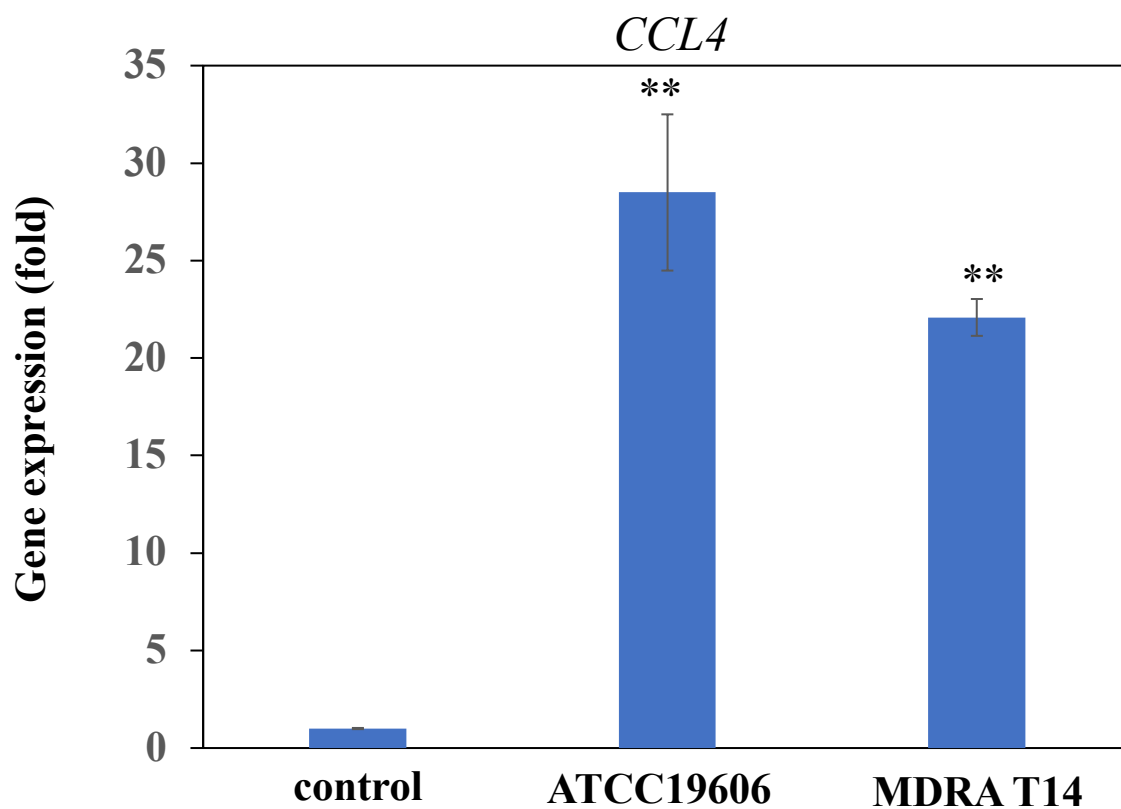

**Figure S2.** *A. baumannii* infection induced mRNA expression of the *CCL4*. Shown is the mRNA-expression ratio compared with that for LAD2 cells cultured medium (control) after infection with *A. baumannii* (ATCC 19606, MDRA T14) at an MOI of 50 for 4h. Fold-changes are presented. \*\* $P < 0.01$ , compared with LAD2 control. Error bars represent the standard error. The data shown are representative of at least 3 independent experiments.

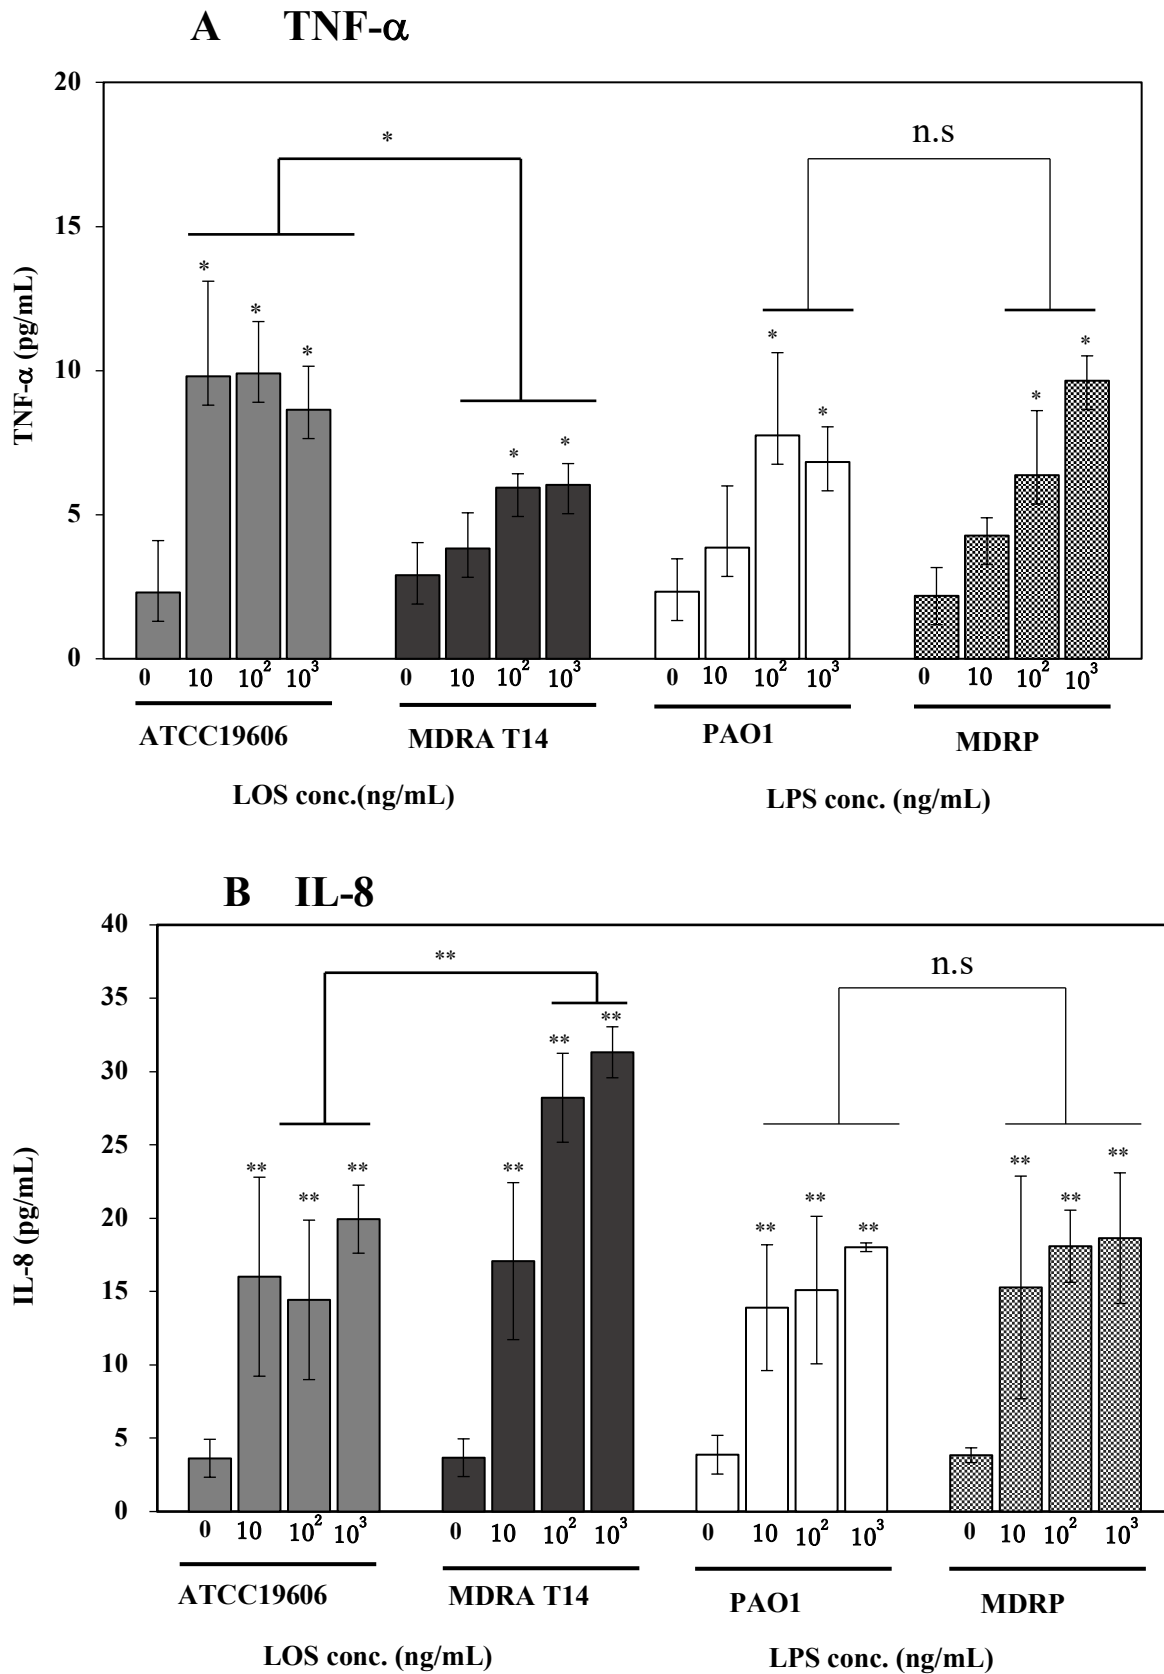

**Figure S3.** Pro-inflammatory cytokines production of LAD2 cells stimulated with LPS derived from *Pseudomonas aeruginosa*, PAO1 and Multi-drug resistant clinical isolate (MDRP). (A) TNF- $\alpha$  and (B) IL-8. LPS from PAO1 was purchased from Sigma-aldrich. LPS from MDRP was purified by the same protocol of LOS of *A. baumannii* in this study. LAD2 cells ( $2 \times 10^6$  cells mL<sup>-1</sup> per well) were seeded in a non-treated 24-well plate supplemented with StemPro-34 medium. Subsequently, LOS from *A. baumannii* ATCC 19606 and MDRA T14 (10 ng/mL to 1  $\mu$ g/mL) or LPS from *P. aeruginosa* PAO1 and MDRP (10 ng/mL to 1  $\mu$ g/mL) were added to the wells and the plates were incubated at 37°C for 4 h under a 5% CO<sub>2</sub>. The supernatants from mast cells were obtained and assayed using the Cytometric Bead Array Human Inflammation Kit (CBA, BD Biosciences, San Diego, CA, USA) following the manufacturer's instructions.
